# Supplementary material for: Trans-palmitoleic acid, a dairy fat biomarker, stimulates insulin secretion and activates G protein-coupled receptors with a different mechanism from the cis isomer
Source: Royal Society of Chemistry journal article supplement (doi:10.1039/d2fo03412c), 2023-01-01
Supplement: d2fo03412c1.xlsx [file d2fo03412c1.xlsx]

## Sheet: Przeżywalność
24h EndoC-betaH1
C [µM]	5	10	25	50	100
cPOA			110.364
		110.163		93.5015
	103.182	100.41	106.722	90.9566
	106.883	104.255	107.572
	93.0953		98.1412	87.7087	-1.28019
	106.322	107.751	105.989		1.05448
	111.617	110.633	107.83		1.14673
		107.792			6.43322
					4.72343
					3.9546
tPOA				103.691
	113.039	105.64	103.334	91.6304	103.157
	103.116	101.741	101.913	84.5486	94.7685
	108.014	107.463	110.959	92.0956	100.362
	100.687	104.88		107.234	80.6116
		105.077	109.602	84.3571	77.4739
	98.9017	102.179	114.804	102.889	93.4576
	98.1384	112.237	113.489	85.2033
	98.2792	103.468	108.48
		113.157
48h EndoC-betaH1
C [µM]	5	10	25	50	100
cPOA
				95.1935
		104.736	104.856	83.825
	100.745	104.467	102.293	73.9572
	113.363	102.135			-0.17718
	106.325	97.5478	110.579		-0.10958
	112.657	106.522	107.684	79.1148	-0.44223
			113.459		4.36167
		101.604			5.34982
		113.279			3.66365
		106.269			3.22202
tPOA				114.477	99.7145
			113.681	92.6873	92.5683
	83.1436	104.935	99.2185	96.3224	92.8801
	96.2328	100.38	95.1772	91.4185	84.3381
	106.227	111.689		112.384	68.6592
	79.7593	112.732		94.8511	84.8494
	104.887	102.645	114.334	106.492	59.5732
	100.68	103.001	116.209	111.877
	113.833	113.274		87.553
	117.884			76.9784
	115.642			70.4023
72h EndoC-beta H1
C [µM]	5	10	25	50	100
cPOA	101.203	93.0303
	106.859	112.96	105.457
	104.098
		117.114
	106.474	108.302			0.038855
	104.504	105.506	107.884		1.16054
	107.836	109.11			-0.0371
	99.0639	100.355	91.4868	36.7396	1.93593
	110.636	112.833		22.6676	3.02161
	112.95	105.999		2.79485	2.4229
					1.91738
tPOA	100.326	97.3863	104.053	90.6467	76.106
	95.6757	105.562	106.042	88.7475	81.0858
	102.526	109.781		100.524	76.8855
	110.826		106.01	90.3232	87.4913
	96.737	105.096	110.268	96.9623	69.5334
	97.571	102.201	105.032	98.5696	61.1204
	95.0984	104.008		94.1228	61.707
	104.811	111.418		93.7446	87.8285
	90.5247	89.3775			89.7214
	85.4236	104.573	107.351		99.9715
	82.7233	100.255	104.206		69.6956
24h MIN6
C [µM]	5	10	25	50	100
cPOA	93.3074	82.0331	67.3826	53.688	35.0428
	103.76	103.636	78.6732	60.086	39.5787
		99.7454	84.032	60.1424	27.6616
		96.1669	72.8762		52.2558
		106.758	88.3993		48.0954
	91.2269	106.135	92.9296		40.4393
	93.8666				23.4584
				44.3796	33.0238
	101.394	73.2928	45.2714	35.6077	21.4999
	93.0524	72.241	48.6332	39.1772	12.9978
	99.1764	74.4504	50.2865	39.375	11.6245
	92.2941	71.7732	52.897	32.7259	14.5706
tPOA	108.948	92.8289	88.6779	88.3234	93.6035
	106.99	103.639	84.7078	87.6196	92.8496
	109.608	103.753	87.1518	95.8324	95.5887
	104.377	115.734	88.2785
	109.824	97.5951	80.21	104.259	97.9719
	93.4628	108.136	97.5861	102.523
	109.718			70.3647	53.4976
	89.7537	87.2597	52.8389	38.6925	38.5864
	89.8935	81.3413	53.2772	39.3941	38.5053
	87.6425	99.2083	54.5622	41.9676	46.006
	100.995	102.408	55.9	44.2884	41.188
	110.284	92.9638	54.9184	47.5818	41.6127
48h MIN6
C [µM]	5	10	25	50	100
cPOA	106.503	99.7452	56.2043	23.3632
		111.878	68.0988	43.1056	6.67249
		108.841	77.2636	33.6827	9.45607
				39.4577	15.2548
			70.8287	36.0315	5.40088
			75.4731	40.7685	5.66632
		90.9847	59.4172	23.2126	11.4088
		81.1496	55.4617	22.717	12.6815
		93.834	67.8182	21.4817	13.3248
	100.566	80.963	96.1745	20.5302	6.24275
	111.638	103.044	101.41	25.6351	4.34238
	97.4409	84.9445	91.91	22.6061	5.18581
tPOA				91.9614	86.6441
				84.3497	87.1055
	115.575			86.5084	87.4222
			101.985	82.7687	82.2968
			99.0109	89.7541	88.8236
		111.981	89.9073		71.6898
			104.35	63.9245	43.5723
	100.558	111.267	80.0976	53.0036	40.5917
	94.1871	108.656	61.293	39.5928	33.99
	92.8166	101.778	80.4755	41.1072	26.0904
	79.3131	106.699	72.9871	45.771	25.9978
	85.1436	97.1699	68.2365	36.101	27.8853
72h MIN6
C [µM]	5	10	25	50	100
cPOA			98.2582	30.3044	5.71671
			96.5041	27.443	4.71373
				27.3066	3.08381
			85.4296	31.3697	3.41536
	113.61		61.3614	22.6975	4.23693
		111.709	74.4513	27.6244	2.9215
				27.0393	1.96079
		115.854	94.7699	25.0574	2.18222
	114.022	116.706	89.1457	20.0415	2.45372
	105.923	97.1378	100.886	20.1613	1.50318
	98.5308	80.7983	92.2521	16.6583	0.5379
	102.672	86.6039	94.6413	20.3783	0.958756
tPOA	91.4168	108.18	89.9418	68.3757	56.4246
	82.5159	109.249	109.635	75.0485	53.9551
		103.438	100.868	68.9753
	114.384		92.2344	58.6732	45.5439
	95.7473	109.532	62.6769	48.6822	61.0417
	100.422	109.273		51.3188	47.42
			99.305	55.0832	29.0471
				67.0032	26.4925
			108.744	74.4604	28.7948
	111.89		89.1452	34.8252	19.0813
	109.942		92.3614	50.3593	23.8298
	112.421		93.7924	42.2555	26.0814
