# Supplementary material for: Trans-palmitoleic acid, a dairy fat biomarker, stimulates insulin secretion and activates G protein-coupled receptors with a different mechanism from the cis isomer
Source: Royal Society of Chemistry journal article supplement (doi:10.1039/d2fo03412c), 2023-01-01
Supplement: d2fo03412c3.xlsx [file d2fo03412c3.xlsx]

## Sheet: GSIS
MIN6 10 uM, 2 and 20mM glucose
	cPOA	tPOA	Control
2 mM Glucose	1.22876	0.984124	1.33566
	1.07711	0.905877	1.5736
	0.934558	1.32095	1.45897
	1.76133	1.26927	1.39041
	1.79845	0.735265	0.782771
	0.812676	1.71448	1.42116
	1.99224	1.41207	0.878601
	0.859649		1.51727
	1.7424		3.37634
			3.0286
			3.65596
			3.90727
			3.75865
			1.09
			0.78
			0.89
			0.91
			0.99
			1.88128
			1.42956
			1.49376
			1.10379
			1.77942
			0.383866
			0.426419
			0.584078
			1.17146
			0.870205
			0.890199
			0.988074
			0.946013
			1.11507
			0.839072
			0.670659
			1.04068
			1.05511
			0.949518
			1.48243
			1.47793
			1.60838
			0.696689
			0.785701
			1.08887
			0.954457
			0.910329
			1.27924
			1.10615
			0.962252
			1.3603
			1.91158
			1.4273
20 mM Glucose	1.82124	1.74413	2.11483
	1.22467	2.47196	3.17983
	1.97257	1.61869	1.80195
	1.76903	2.04223	1.42924
	1.4896	2.43845	2.86267
	2.41416	2.50222	2.73875
	2.4282	1.83448	2.52771
	2.3561	2.02392	2.72885
	1.83423	1.32483	2.25871
	1.33489	0.909476	1.42669
			3.22244
			4.48769
			4.34098
			4.06177
			1.52
			1.35
			1.5
			1.64
			1.33
			1.68
			1.82
			1.47
			2.34096
			2.02353
			2.07769
			2.17612
			3.1149
			0.852927
			0.791763
			0.817454
			1.58561
			1.504
			1.053
			1.25952
			1.24826
			1.49212
			1.26162
			1.54736
			1.47228
			1.12201
			1.02926
			1.43206
			1.05511
			1.35275
			2.22984
			2.40251
			1.14561
			0.993853
			0.928947
			1.38122
			1.29726
			1.84582
			1.85268
			2.11388
			1.78038
			2.03661
MIN6 25 uM, 2 and 20mM glucose
	cPOA	tPOA	Control
2 mM Glucose	1.72053	1.62099	1.33566
	1.94803	1.7774
	1.73474	1.99069	1.45897
	2.17554	1.80584	1.39041
	1.96225	1.64943
			0.782771
			1.42116
	1.32214	1.2904
			0.878601
	1.80142	2.99653
	2.16633	1.8512
	2.24708	2.42705
	2.18805	2.76001
	0.990572	3.72356
	2.04844	1.46484
	1.87706	1.47447
	1.86914	1.92036
			3.0286
	2.78361	2.51963
	2.75249	2.88897
	1.87524	2.05026
	2.06713	1.88875
	2.61165	2.3321
	1.76633	2.79118
	1.50051	3.22312	1.09
	1.45784
	2.09759	2.39059	0.78
	2.35467	1.97785
		2.93597
			0.89
	2.80622	3.21195	0.91
	2.52698	1.67127
	3.29984	1.58969	0.99
	1.71944	3.04898
	2.36086	2.38319	1.88128
	2.95718	1.82492
	3.10246	2.89631
	1.63463	2.42979	1.42956
	3.38838	3.52102	1.49376
		3.64527
	2.00766	1.86728	1.10379
	2.47362		1.77942
	2.34671	2.16593	0.383866
	2.66583	2.25181	0.426419
			0.584078
			1.17146
			0.870205
			0.890199
			0.988074
			0.946013
			1.11507
			0.839072
			0.670659
			1.04068
			1.05511
			0.949518
			1.48243
			1.47793
			1.60838
			0.696689
			0.785701
			1.08887
			0.954457
			0.910329
			1.27924
			1.10615
			0.962252
			1.3603
			1.91158
			1.4273
20 mM Glucose	1.7026	2.96257	0.852927
	2.00086	2.12507	0.791763
		3.06771	0.817454
	1.48635	2.47423
	2.22903	2.03705	1.58561
	1.82675	1.82728	1.504
	2.30516	2.88763
	2.24763	3.58877	1.053
	2.78294		1.25952
			1.24826
			1.49212
	1.51708	1.97937	1.26162
	2.06771	2.15259	1.54736
	1.89455	1.9499
			1.47228
	2.11408	2.18933	1.12201
	2.31446	1.72436	1.02926
	2.39297	1.6559
			1.43206
	2.56024	2.44796	1.05511
	2.08889	2.36447	1.35275
	1.90803
			2.22984
			2.40251
		2.06907
	1.85474	1.85878
	2.00106		1.14561
	2.00734		0.993853
		2.23346	0.928947
	2.0428	2.26581
	1.74717	2.42707	1.38122
	2.08756
		2.11256	1.29726
	1.91055	2.66289
	1.54295
	2.04114		1.84582
			1.85268
		3.55596	2.11388
	2.0564	3.28744	1.78038
	1.52119	2.77023	2.03661
		3.15838
	2.27457	1.86077
	2.59208	3.47447
	1.97003
	3.33256	3.59043
	3.25321	3.09452
	2.61844	2.75729
	3.09452	3.33256
	2.87631	3.47141
	2.45974	2.57876
	4.02684	3.98717
	2.25959	2.1599
	3.03881	4.15664
	2.8718	2.19575
EndoC 10 uM, 2 and 20mM glucose
	cPOA	tPOA	Control
2 mM Glucose	1.59114	1.54147
	1.86559	1.8489	0.603356
	1.05214	1.05663	0.443569
	1.37564	1.30297	0.713182
		0.684089	0.74816
		0.654879	0.461398
	1.56238		0.550386
	1.84075		0.525786
	1.804	1.23226
	1.82689	1.83629	1.41785
	1.18801		1.24664
			1.00833
			1.55425
	1.4285
	1.16352
			1.74564
			1.32726
		1.21237	2.34259
			0.817474
		1.82525	1.03377
		1.2349	1.13366
	1.01179		0.854567
			0.988539
	2.35459		3.07586
	1.09289		2.96983
			4.40384
	1.47683		0.853314
	1.57339		0.798234
			1.1172
			0.561256
	1.18851		0.627845
			0.637064
			0.53505
			0.652548
			0.714585
			0.460752
			0.430312
			0.418555
			0.451959
			0.44656
			0.98843
			0.981696
			0.830067
			0.862407
			0.483455
			0.465866
			0.516902
			0.674821
			0.548267
			0.470932
			0.417654
			0.486887
			0.660944
			1.31934
			1.19979
			1.30495
20 mM Glucose	2.88835	2.43229	0.853029
	4.80846		0.804
	2.32112	2.18754	0.733
	3.38079	4.10248	1.24655
	2.4624	2.14507	1.56244
	2.46528	4.41213	1.29769
	3.84912	2.36171	1.56547
	2.52576	2.36171	1.0795
	3.12624	3.49017	1.13001
	2.66688	2.72207
			2.87469
	4.79408		2.04307
	3.83761	2.18754	2.43487
	3.37068	4.10248	2.79043
	3.11689	2.14507
	2.6589	4.41213
		3.49017	4.31155
	2.88835	2.44786	3.34927
	4.80846	2.72207	3.2618
	2.32112
	3.38079	2.43229
	2.4624		1.83615
	2.46528	2.18754
	3.84912	4.10248
	2.52576	2.14507
	3.12624	4.41213	1.99703
	2.66688	2.36171	2.12444
		2.36171	1.36873
	4.79408	3.49017	1.52044
	3.83761	2.72207
	3.37068
	3.11689
	2.6589	2.18754
		4.10248
		2.14507
		4.41213	1.95389
		3.49017	2.0026
		2.44786	1.88461
		2.72207
			1.36012
			1.13155
			1.38267
			1.38852
			1.05212
			1.31173
			1.59625
			1.06666
			1.21689
			1.20123
			1.11807
			1.14165
			2.6563
			2.61336
			2.41749
			3.1668
			1.1005
			0.969566
			1.37812
			1.06014
			0.630516
			1.09498
			0.953284
			0.732573
			0.813376
			0.756009
			0.748939
			0.639664
			0.673215
			0.932047
			0.919048
			0.975734
			0.546726
			0.628332
			0.522606
			0.678174
			0.909605
			0.830814
			2.88361
			2.92952
			2.55345
			0.588226
			0.577948
			0.681459
			0.74025
			0.814816
EndoC cPOA, tPOA 10uM+2uM ant [%]
cPOA	cPOA +DC	cPOA +CID	cPOA +C8	cPOA +AH
198.007		188.281	98.1266	339.662
329.637	145.264	121.256	151.57
159.121
231.766
168.806
169.004	158.587		114.465	87.3515
263.871		184.935	202.651	67.1307
173.15
214.315
182.824	153.645
			225.386	109.873
328.651		116.827	118.008	113.009
263.082
231.072
213.674	111.73	188.281	98.1266	339.662
182.277	145.264	121.256	151.57
198.007
329.637
159.121	158.587	195.86	114.465	87.3515
231.766		184.935	202.651	67.1307
168.806
169.004
263.871	153.645
173.15			225.386	109.873
214.315		116.827	118.008	113.009
182.824
tPOA	tPOA +DC	tPOA CID	tPOA +C8	tPOA +AH	DC	CID	C8	AH
166.742	120.715	187.592	82.576	162.398	106.449	111.164	124.148	67.4938
	148.264	133.559	145.566	316.713	86.5547	80.3019	73.0108
149.964					120.394	103.174	85.5954	57.7594
281.239						83.3981	136.233	116.6
147.052					109.016
302.467	143.764	166.235	96.0598	90.4133	77.2828	173.089	97.2812	93.6886
161.904		175.29	193.891	75.6589	92.8816	97.9803		63.2467
161.904						128.843	78.1046	96.7757
239.264	182.762				99.7362	96.7818	150.516	84.1512
186.608	152.722				70.1559
		76.7691	313.277	100.326	93.8162	82.8987	164.399	68.6232
		140.842	357.272	135.038	49.9669	99.2787	110.565	123.887
149.964						107.668	138.631
281.239						103.773	125.047	78.4092
147.052	120.715	187.592	82.576	162.398
302.467	148.264	133.559	145.566	316.713	127.245			127.245
239.264					125.047			120.752
167.809					102.275			160.804
186.608
	143.764	166.235	96.0598	90.4133	115.259			148.019
166.742		175.29	193.891	75.6589	120.253			113.062
					92.6868			210.143
149.964	182.762
281.239	152.722				119.454			133.637
147.052		76.7691	313.277	100.326	101.276			145.422
302.467		140.842	357.272	135.038	182.976			85.4955
161.904
MIN6 cPOA, tPOA 25uM+2uM ant
cPOA	cPOA +DC	cPOA +CID	cPOA +C8	cPOA +AH
120.764	140.189	133.388	117.891	94.7296
141.92	150.15	146.57	124.058	103.484
	105.334	155.332	95.3606	82.8427
105.426	150.83	127.374	162.09	119.166
158.104		162.788	122.864	107.876
129.571	116.595		162.774	123.349
163.504		98.0894	142.117
159.423	123.341	173.601
197.392	128.633	98.7822	137.425
107.606
146.661
134.379
149.951
164.163
169.732
181.597
148.164
135.335
131.556
141.934
142.38
144.895
123.926
148.07
135.514
109.441
144.777
145.859
107.897
161.334
183.855
139.733
236.376
230.748
185.724
219.492
204.015
174.468
285.621
160.271
215.541
203.695
tPOA	tPOA +DC	tPOA +CID	tPOA +C8	tPOA +AH	DC	CID	C8	AH
210.133	225.499	153.242	135.379	158.99	136.389		97.8042	70.8258
150.73	190.255	137.322	113.757	143.591	155.441	139.834	125.533	84.3715
217.591	161.453	145.567	140.834		114.744	152.234	108.136	68.291
175.496	99.607	156.964		107.96
144.487	85.7676	124.279	151.61	135.542	121.704	120.438	78.313	108.127
129.608	91.5506	130.747	140.685		165.842	141.66	58.7952	101.645
					89.7826	114.878	87.9843	138.15
204.818	130.752	144.66	121.021
254.55	186.45	104.01	122.951		137.22	108.069	116.487
	158.542	103.535	136.164		84.0222	109.306
					85.5349	109.239	135.003
140.396
152.682
138.305
155.288
122.308
117.452
173.632
167.71
146.758
131.842
158.418
160.712
172.15
149.842
188.877
252.222
233.177
196.49
224.022
131.983
246.442
254.667
219.492
195.573
236.376
246.225
182.91
282.808
153.201
294.828
155.744
