# Supplementary material for: Trans-palmitoleic acid, a dairy fat biomarker, stimulates insulin secretion and activates G protein-coupled receptors with a different mechanism from the cis isomer
Source: Royal Society of Chemistry journal article supplement (doi:10.1039/d2fo03412c), 2023-01-01
Supplement: d2fo03412c4.xlsx [file d2fo03412c4.xlsx]

## Sheet: Expression
	MIN6
	MIN6 cell line
Receptor	GPR40	GPR55	GPR119	GPR120
2^(dCt)	0.0510434	2.0674e-05	4.9213e-05	0.00450379
	0.0359364	0.000154245	0.00244605	0.00766817
	0.0213872	9.878e-06	9.7546e-05	0.00692213
	0.0350985	1.6958e-05	9.442e-06	0.00537471
	0.0183416	4.4064e-05	1.7826e-05	0.0081483
	0.0396862	0.000384858	0.00325274	0.0054466
	0.0256282	1.1315e-05	6.2327e-05	0.00472647
	0.0126161	1.0882e-05		0.00751341
	0.035866			0.00740511
	0.0343862			0.00370563
	0.0133886			0.00783222
	0.0175665			0.00888726
				0.0117819
				0.0124119
				0.0270055
				0.000760123
				0.0143499
				0.0130232
				0.0300204
				0.000824991
				0.0121922
				0.00927337
				0.0326186
				0.00876671
				0.0113575
				0.0107084
				0.0289392
				0.00943742
	EndoC-βH1 cell line
Receptor	GPR40	GPR55	GPR119	GPR120
2^(dCt)	0.000586	1.22e-05	0.000488	1.42e-05
	0.000706	1.29e-05	0.000556	2.73e-05
	0.003552	1.37e-05	0.002959	3.07e-05
	0.003628	1.79e-05	0.00402	3.79e-05
	0.004211	1.9e-05	0.00696	3.94e-05
	0.004569	2.06e-05	0.007074	3.99e-05
	0.004704	2.08e-05	0.007585	4.35e-05
	0.00549	2.13e-05	0.008032	8.42e-05
	0.006424	2.28e-05	0.008247	0.000118
	0.007404	2.29e-05	0.008363	0.000137
	0.008414	2.29e-05	0.008821	0.000169
	0.008417	2.37e-05	0.009076	0.000177
	0.010522	2.38e-05	0.009292	0.000271
	0.010951	2.69e-05	0.009798	0.000279
	0.011288	2.77e-05	0.009971	0.00028
	0.011606	3.31e-05	0.010472	0.000306
	0.013961	3.45e-05	0.010577	0.000327
	0.014156	3.45e-05	0.01175	0.000357
	0.014622	3.62e-05	0.011777	0.000373
	0.017388	3.63e-05	0.013423	0.000373
	0.020096	3.68e-05	0.013558	0.000454
	0.020719	3.74e-05	0.014486	0.000495
	0.023673	0.000145	0.015029	0.000497
	0.024897	0.000147	0.016794	0.000683
	0.027302	0.000852	0.020188	0.000684
	0.032006	0.001121	0.02393	0.000844
	0.033213	0.00261	0.050685	0.001206
	0.033355	0.005451	0.069485	0.001251
	0.042746	0.006138		0.001294
	0.045883	0.00692		0.00282
	0.049467	0.007402		0.002903
	0.066872	0.008478		0.00847
		0.01325		0.010361
		0.037387		0.01298
		0.049521		0.013269
