# Supplementary material for: Trans-palmitoleic acid, a dairy fat biomarker, stimulates insulin secretion and activates G protein-coupled receptors with a different mechanism from the cis isomer
Source: Royal Society of Chemistry journal article supplement (doi:10.1039/d2fo03412c), 2023-01-01
Supplement: d2fo03412c5.xlsx [file d2fo03412c5.xlsx]

## Sheet: Calcium
MAX Ca2+ MIN6
10 uM cPOA and tPOA		cPOA	tPOA	Control
	2 mM Glucose	4	126	7
		39	179	13
		22	107	35
		49	87	79
		92	129	25
		76	92
		2	66
		11	56
			25
			12
			9
	20 mM Glucose	60	83	19
		27	11	7
		29	90	3
		26	42	29
		41	26	5
		24	68	15
			48	55
			31	73
				74
				73
				69
				75
				55
				75
				68
25 uM cPOA and tPOA		cPOA	tPOA	Control
	2 mM Glucose	177	219	55
			304	73
			260	74
		410	226	73
		395	162	69
		448	222	75
		294		55
		228		75
		303	443	68
		238	555	19
		295		7
				3
				29
				5
				15
	20 mM Glucose	252	386	166
		228	284	122
			301	57
		208	280	29
		272	202
		503	173
		407
		426	366
		434	494
		242	469
		322	467
			442
MAX Ca2+ EndoC
	cPOA	tPOA	Control
	350	131.58	43
	252	113.22	28
	353		6
	356	131.58	4
	358	223.38
		122.4
2 mM glucose		165.24
	449	208.08	16
	397		17
	580		53
	596.96	474.3	22
	609.31	703.8	25
	564		14
	496.5	134.64	40
20 mM glucose	385.88	523.26	39
	556.56		41
			15
	462.06		45
	296.82		55
	688.5		41
			33
	220.32		43
	584.46		11
	703.8		55
	884.34		14
MAX Ca2+ Endo 10 uM+2uM ant. [%]
cPOA	cPOA +DC	cPOA +CID	cPOA +C8	cPOA +AH
1395.86	1215.54	317.098	475.648	540.933
1234.2	366.839	727.461	1299.48
1803.11	898.446	1321.24	1032.12	422.798
1855.83	1144.54			1078.26
	1478.49	1414.32	1590.78	1239.2
1753.37	1361.66	1080		1497.82
1543.52		1560.62	1407.51	1271.5
1199.63	1428.75	1524.5
1730.24	1334.8	1507.15		1481.78
1234.2	366.839	727.461	1299.48
1803.11	898.446	1321.24	1032.12	422.798
1855.83	1144.54			1078.26
	1478.49	1414.32	1590.78	1239.2
1753.37	1361.66	1080		1497.82
1543.52		1560.62	1407.51	1271.5
1199.63	1428.75	1524.5
1730.24	1334.8	1507.15		1481.78
tPOA	tPOA +DC	tPOA +CID	tPOA +C8	tPOA +AH	DC	CID	C8	AH
646.881					6.21762	6.21762	9.32643	90.1554
	423.047	673.741	470.052		68.3938	31.0881	71.5026	93.2643
285.389	282.031	736.414		78.342	6.21762	49.7409	46.6321	118.135
	548.394	595.399	532.725		24.8705	40.4145	96.3731	65.285
	438.715	172.352		736.414	90.1554	46.6321	12.4352	34.1969
	454.383	423.047		297.7	31.0881	90.1554	59.0674	40.4145
376.041	877.43		203.689	329.036	37.3057	71.5026	102.591	46.6321
1112.46	470.052		799.088	235.026		93.2643	149.223	27.9793
517.057		94.0104	297.7	423.047		31.0881	115.026	68.3938
454.383		626.736				80.829	133.679	111.917
	219.357					87.0466	180.311	96.3731
	313.368					105.7	146.114	133.679
							102.591	37.3057
646.881							37.3057	49.7409
	423.047	673.741	470.052				12.4352	37.3057
285.389	282.031	736.414		78.342			133.679	96.3731
	548.394	595.399	532.725				80.829	115.026
	438.715	172.352		736.414			3.10881	15.544
	454.383	423.047		297.7
376.041	877.43		203.689	329.036
1112.46	470.052		799.088	235.026
517.057		94.0104	297.7	423.047
454.383		626.736
	219.357
	313.368
