# Supplementary material for: Trans-palmitoleic acid, a dairy fat biomarker, stimulates insulin secretion and activates G protein-coupled receptors with a different mechanism from the cis isomer
Source: Royal Society of Chemistry journal article supplement (doi:10.1039/d2fo03412c), 2023-01-01
Supplement: d2fo03412c6.xlsx [file d2fo03412c6.xlsx]

## Sheet: cAMP 
MIN6 cPOA and tPOA 25 uM
cPOA	tPOA	Control
0.70281	0.83101	0.67092
0.62372	1.01091	0.70781
	0.967	0.98106
	1.00216	0.72672
	0.85575	0.62832
EndoC cPOA and tPOA 10cPOA
cPOA	tPOA	Control
1.86249	2.45876	1.64962
1.31787	2.04517	1.40904
1.63308
0.83141		1.19755
1.87487	2.85741	1.4063
	2.36673	1.23086
		1.53331
	2.16948	1.48271
EndoC tPOA 10uM + 2uM ant [%]
tPOA	tPOA +DC	tPOA CID	tPOA +C8	tPOA +AH	DC	CID	C8	AH
167.186	84.1572	111.881	111.833	93.4886	97.1018	111.668	113.829	83.3482
173.687	97.7031	92.032	138.516	100.533		104.116	137.141	106.716
153.252		118.922	111.833	80.1789	114.423	117.693	131.2	93.8029
144.471			138.516
201.848
