# Supplementary material for: Trans-palmitoleic acid, a dairy fat biomarker, stimulates insulin secretion and activates G protein-coupled receptors with a different mechanism from the cis isomer
Source: Royal Society of Chemistry journal article supplement (doi:10.1039/d2fo03412c), 2023-01-01
Supplement: d2fo03412c15.pdf [file d2fo03412c15.pdf]

1 ***Trans* palmitoleic acid, a dairy fat biomarker, stimulates insulin secretion**  
2 **and activates G protein-coupled receptors with a different mechanism than**  
3 ***cis* isomer**  
4

5 Eliza Korkus<sup>a</sup>, Marcin Szustak<sup>a</sup>, Rafal Madaj<sup>b,c</sup>, Arkadiusz Chworos<sup>b</sup>, Anna Drzazga<sup>a</sup>, Maria  
6 Koziolkiewicz<sup>a</sup>, Grzegorz Dąbrowski<sup>d</sup>, Sylwester Czaplicki<sup>d</sup>, Iwona Konopka<sup>d</sup>, Edyta  
7 Gendaszewska-Darmach<sup>a\*</sup>

8  
9 <sup>a</sup>Faculty of Biotechnology and Food Sciences, Institute of Molecular and Industrial  
10 Biotechnology, Lodz University of Technology, Stefanowskiego 2/22, 90-537 Lodz, Poland

11 <sup>b</sup> Division of Bioorganic Chemistry Centre of Molecular and Macromolecular Studies, Polish  
12 Academy of Sciences, Sienkiewicza, 112, 90-363 Lodz, Poland

13 <sup>c</sup> Institute of Evolutionary Biology, Faculty of Biology, Biological and Chemical Research  
14 Centre, University of Warsaw, Żwirki i Wigury 101, 02-089, Warsaw, Poland.

15 <sup>d</sup>Faculty of Food Sciences, Chair of Plant Food Chemistry and Processing, University of  
16 Warmia and Mazury in Olsztyn, Pl. Cieszyński 1, 10-957 Olsztyn, Poland

17

18

19 \*corresponding author; e-mail: edyta.gendaszewska-darmach@p.lodz.pl

20

21

22

23

24

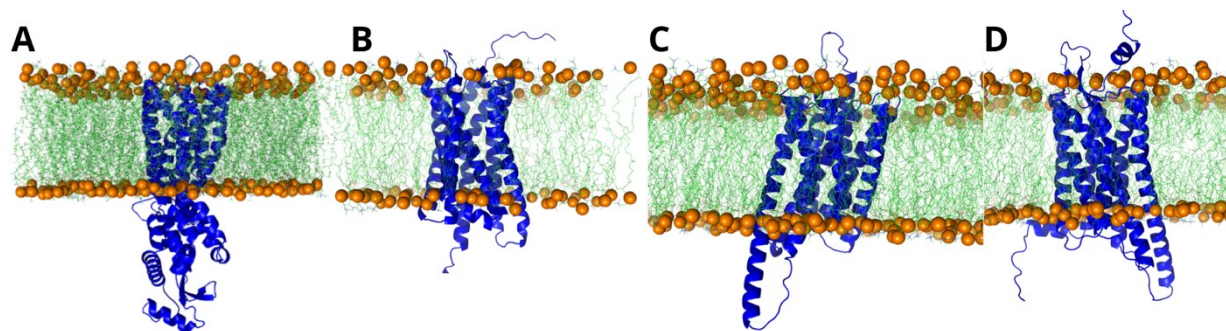

25

26 Supplemental Figure 1. Structures of GPR40 (A), GPR55 (B), GPR119 (C) and GPR120 (D) in 1-  
 27 palmitoyl-2-oleoyl-*sn*-glycero-3-phosphatidylcholine/1-palmitoyl-2-oleoyl-*sn*-glycero-3-  
 28 phosphatidylglycerol/cholesterol membrane.

29

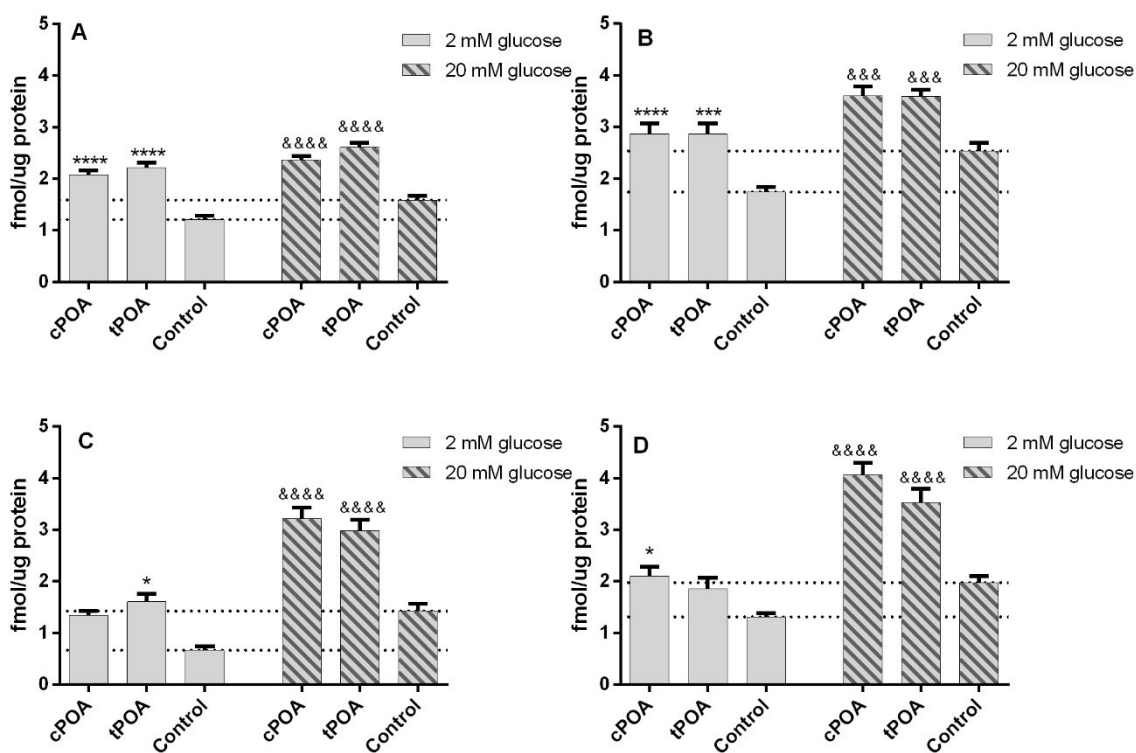

30

31 Supplemental Figure 2. Acute and long-term effect of *cis* and *trans* isomers of palmitoleic on GSIS.  
 32 MIN6 cells were treated with cPOA and tPOA (25  $\mu$ M) for 1,5 h (A) and 24 h (B). EndoC- $\beta$ H1 cells  
 33 were treated with cPOA and tPOA (10  $\mu$ M) for 1,5 h (C) and 24 h (D). The bars represent the means  $\pm$   
 34 SEM from at least 3 independent experiments. \*\*\*\* $p$  < 0.0001, \*\*\* $p$  < 0.001, \* $p$  < 0.05 vs 2 mM glucose  
 35 control; &&&& $p$  < 0.0001, &&& $p$  < 0.001, && $p$  < 0.01 vs 20 mM glucose control.

36

37

38

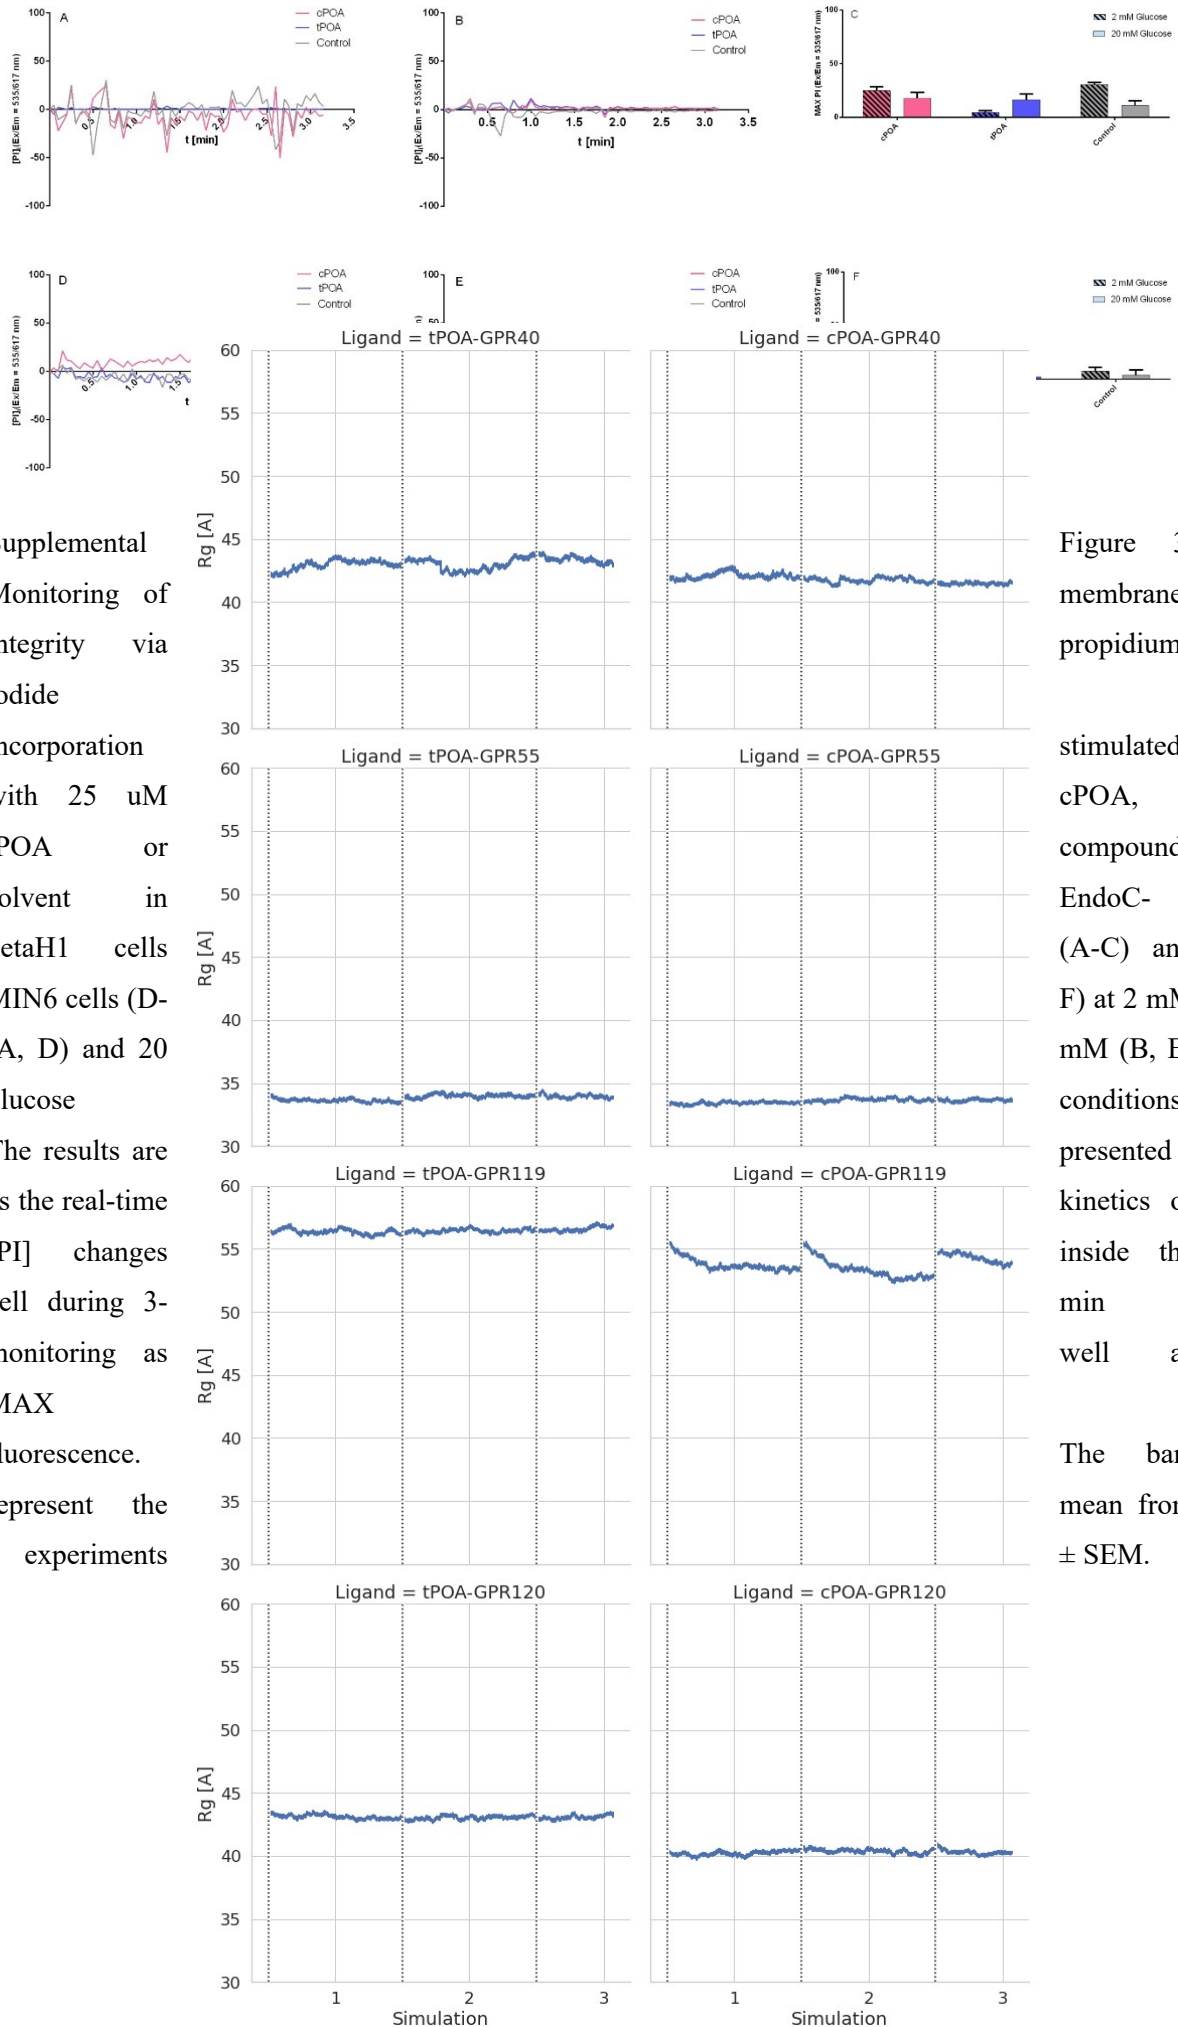

39  
 40 Supplemental  
 42 Monitoring of  
 44 integrity via  
 46 iodide  
 48 incorporation  
 50 with 25  $\mu$ M  
 52 tPOA or  
 54 solvent in  
 56 betaH1 cells  
 58 MIN6 cells (D-  
 60 (A, D) and 20  
 62 glucose  
 64 The results are  
 66 as the real-time  
 68 [PI] changes  
 70 cell during 3-  
 72 monitoring as  
 73 MAX  
 74 fluorescence.  
 76 represent the  
 78 3 experiments  
 80  
 81  
 82  
 83  
 84  
 85

Figure 3. membrane propidium stimulated cPOA, compound EndoC- (A-C) and F) at 2 mM mM (B, E) conditions. presented kinetics of inside the min well as The bars mean from  $\pm$  SEM.

86  
87  
88  
89  
90  
91  
92  
93  
94  
95  
96  
97  
98  
99  
100  
101  
102  
103  
104  
105  
106  
107  
108  
109  
110  
111  
112  
113  
114  
115  
116  
117  
118  
119  
120  
121  
122  
123  
124  
125  
126  
127  
128  
129  
130  
131  
132  
133  
134  
135  
136  
137  
138  
139  
140

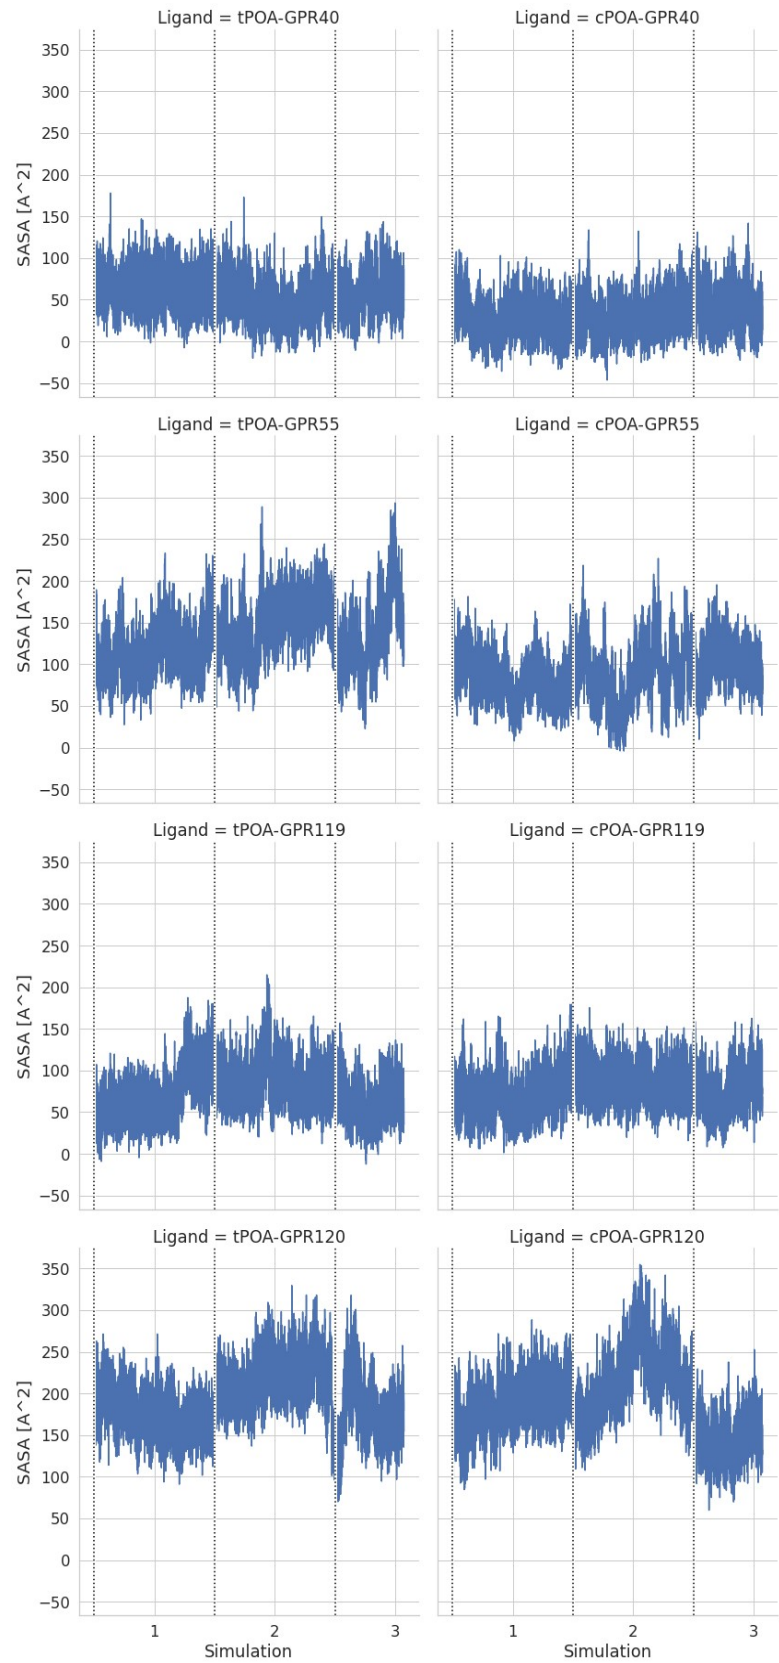

Supplemental Figure  
gyration of receptors  
each molecular  
simulation with  
complexed ligand

4. Radius of  
throughout  
dynamics  
respect to

141  
142  
143  
144  
145  
146  
147  
148  
149  
150  
151  
152  
153  
154  
155  
156  
157  
158  
159  
160  
161  
162  
163  
164  
165  
166  
167  
168  
169  
170  
171  
172  
173  
174  
175  
176  
177  
178  
179  
180  
181  
182  
183  
184  
185

186 Supplemental Figure 5. Solvent-accessible surface area of each complexed ligand during molecular  
187 dynamics simulations

188  
189  
190

191  
 192  
 193  
 194  
 195  
 196  
 197  
 198  
 199  
 200  
 201  
 202  
 203  
 204  
 205  
 206  
 207  
 208  
 209  
 210  
 211  
 212  
 213  
 214  
 215  
 216  
 217  
 218  
 219  
 220  
 221  
 222  
 223  
 224  
 225  
 226  
 227  
 228  
 229  
 230  
 231  
 232  
 233  
 234  
 235  
 236  
 238  
 240  
 242  
 243  
 244

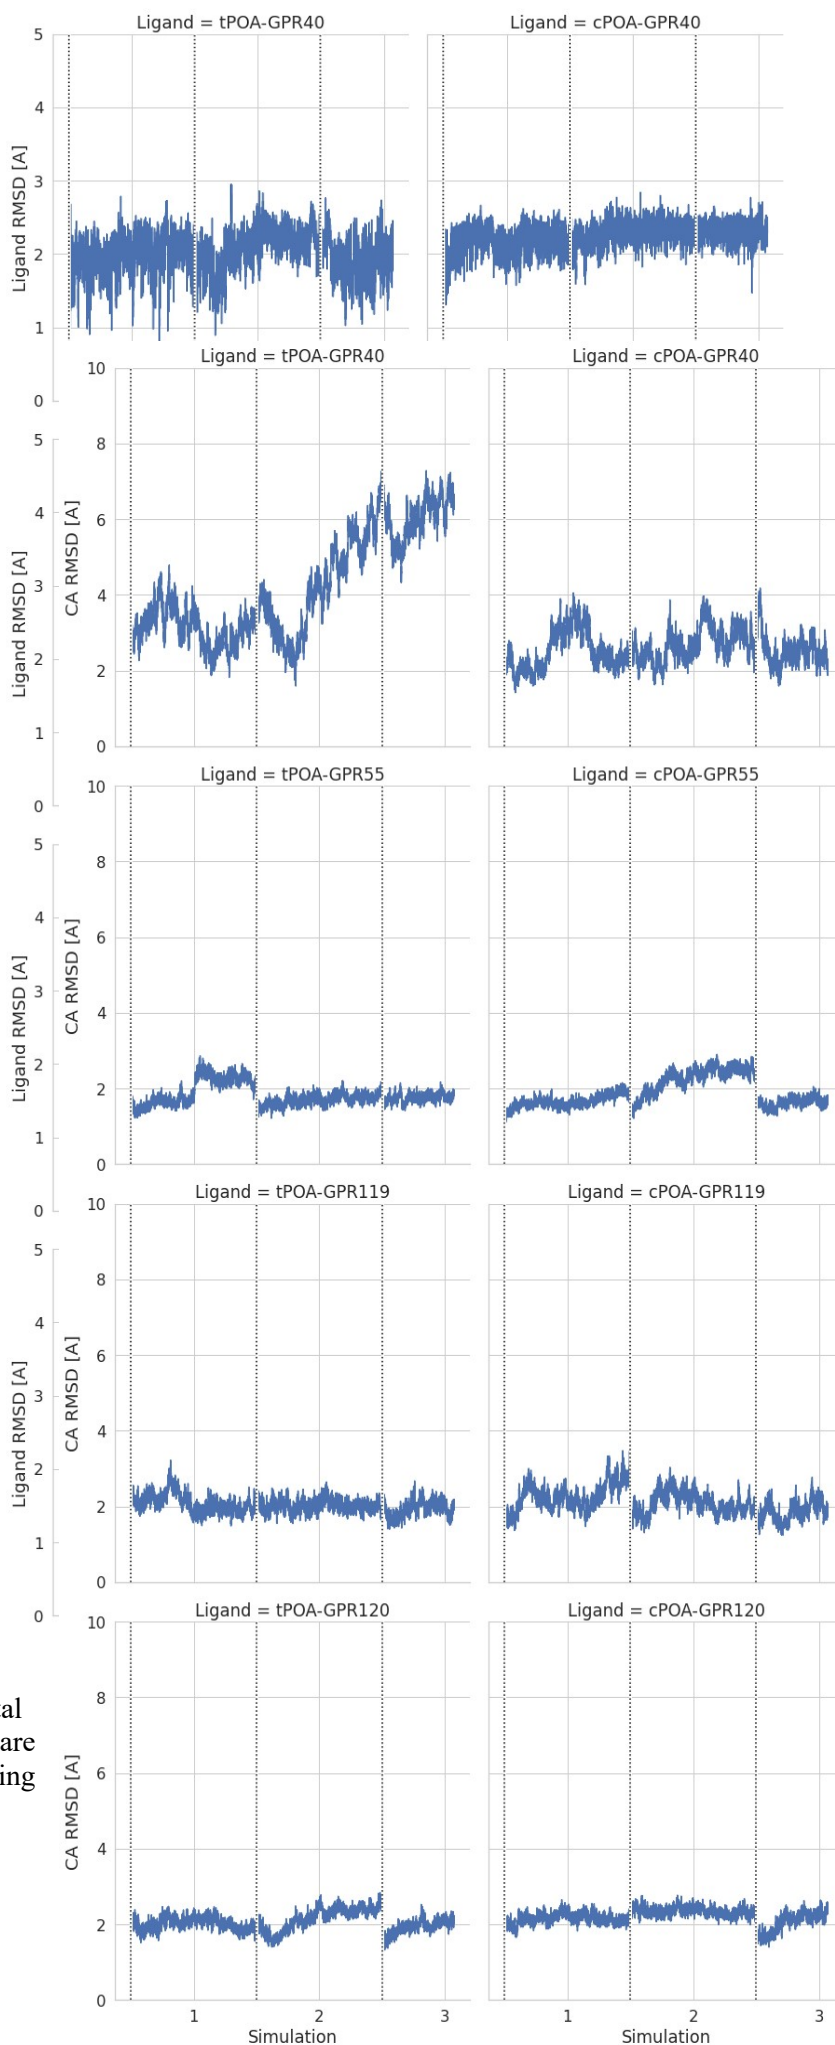

Supplemental  
 mean square  
 ligands during  
 dynamics

Figure 6. Root  
 deviation of  
 each molecular

245  
246  
247  
248  
249  
250  
251  
252  
253  
254  
255  
256  
257  
258  
259  
260  
261  
262  
263  
264  
265  
266  
267  
268  
269  
270  
271  
272  
273  
274  
275  
276  
277  
278  
279  
280  
281  
282  
283  
284  
285  
286  
287  
288  
289  
290  
291

292 Supplemental Figure 7. Root mean square deviation of protein C $\alpha$  atoms of each receptor throughout  
293 molecular dynamics simulations

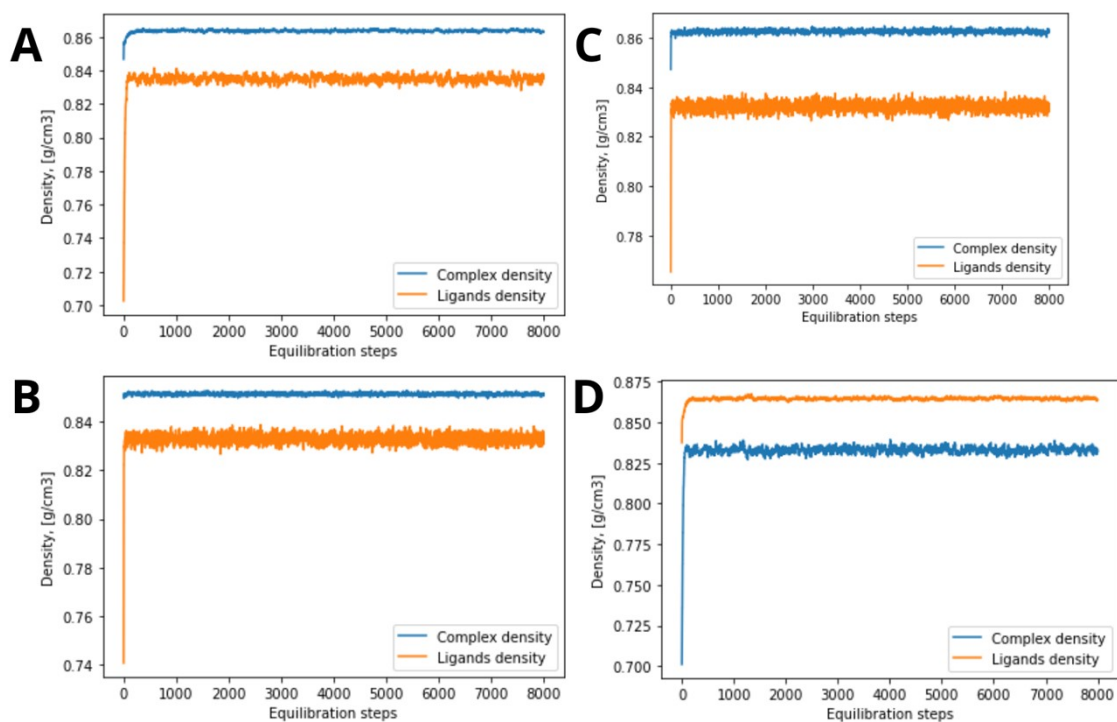

294 Supplemental Figure 8. Density of systems during equilibration procedure for thermodynamic  
 295 integration

296

297

298

299



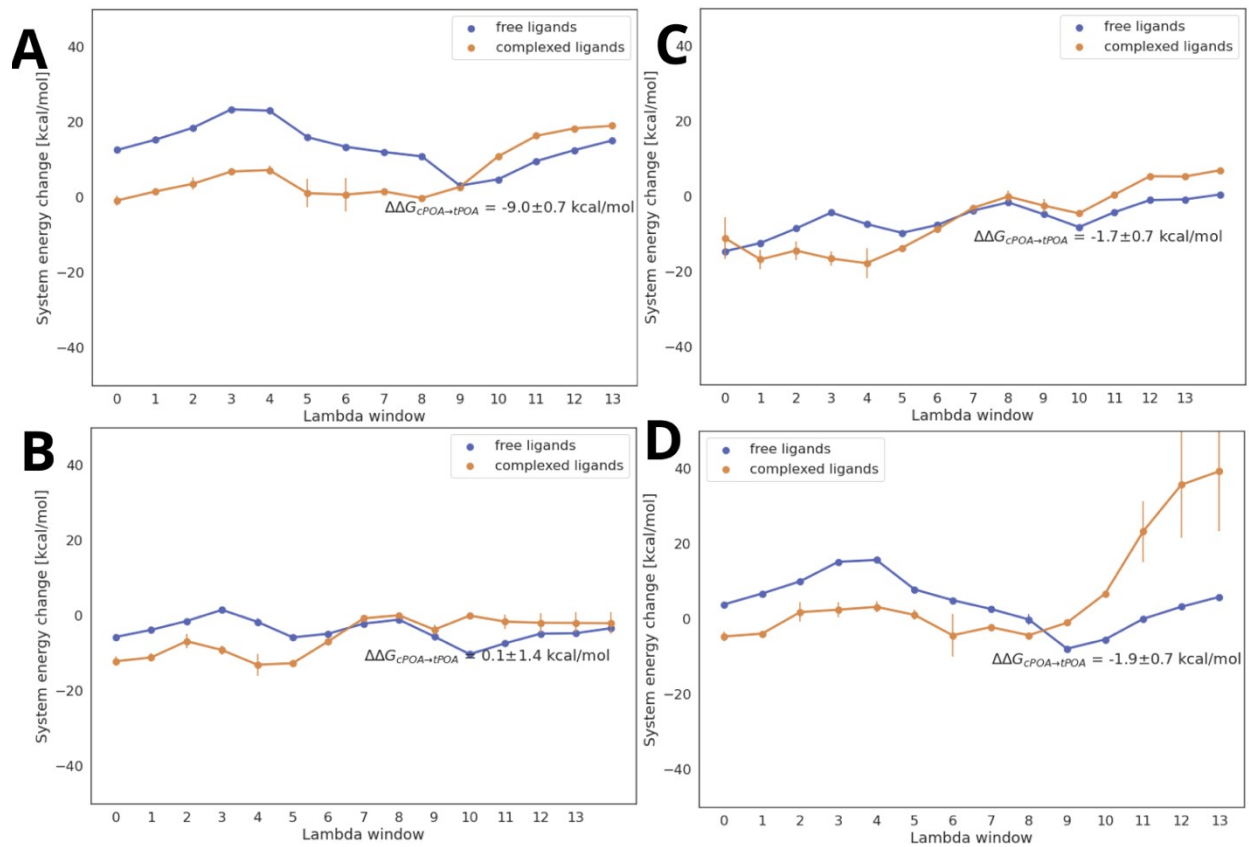

300  
 301 Supplemental Figure 9. System energy changes during cPOA-tPOA transformation. Total  $\Delta\Delta G$  is  
 302 obtained through trapezoid integration of the area under each curve, followed by calculating the  
 303 difference between the complex state (complexed ligands, orange line) and protein-free state (free  
 304 ligands, blue line). Each point represents the value from three repetitions and standard deviation. As one  
 305 may notice, in each case, the energy of both systems was almost identical when the presence of tPOA  
 306 was slightly higher than cPOA. (A) depicts GPR40, (B) GPR55, (C) GPR119 and (D) GPR120 systems.  
 307  
 308  
 309
